# Supplementary material for: The virus-induced protein APOBEC3G inhibits anoikis by activation of Akt kinase in pancreatic cancer cells
Source: Sci Rep. 2015 Jul 16;5:12230. doi: 10.1038/srep12230 (PMC4503957; doi:10.1038/srep12230)
Supplement: Supplementary Information [file srep12230-s1.pdf]

# **The virus-induced protein APOBEC3G inhibits anoikis by activation of Akt kinase in pancreatic cancer cells**

**Jia Wu<sup>1</sup>, Tian-Hui Pan<sup>1</sup>, Song Xu<sup>1</sup>, Li-Tao Jia<sup>1,3</sup>, Lin-Lin Zhu<sup>1</sup>, Jian-Shan Mao<sup>1</sup>, Yong-Liang Zhu<sup>1,2</sup> & Jian-Ting Cai<sup>1</sup>**

<sup>1</sup> Laboratory of Gastroenterology, Second Affiliated Hospital of Zhejiang University, School of Medicine, Hangzhou, China; <sup>2</sup> Cancer Institute and Education Ministry Key Laboratory of Cancer Prevention and Intervention, Zhejiang University School of Medicine, Hangzhou, China; <sup>3</sup> Department of Gastroenterology, Tongde Hospital of Zhejiang Province, Hangzhou, China.

**Corresponding author:** Dr. Yong-Liang Zhu, Laboratory of Gastroenterology, Second Affiliated Hospital of Zhejiang University School of Medicine, Hangzhou, Zhejiang Province, 310009, China. Tel: 86-571-87767061, Fax: 86-571-87214404, Email: drylzh@163.com, or Dr. Jian-Ting Cai, Email: jtcai@live.cn.

**Supplementary Table S1** Differently expressed genes in the global cDNA microarray

| Gene Symbol    | Ratio  | Gene Symbol             | Ratio | Gene Symbol       | Ratio |
|----------------|--------|-------------------------|-------|-------------------|-------|
| ANKRD22        | 20.528 | TMCC1                   | 3.156 | CCDC69            | 2.524 |
| KRT20          | 9.074  | SDR16C5                 | 3.098 | TNFRSF10D         | 2.524 |
| CCL26          | 8.972  | CXorf50B                | 3.098 | SEPP1             | 2.523 |
| TXNIP          | 8.891  | CCDC69                  | 3.095 | TNFSF9            | 2.514 |
| G0S2           | 8.336  | EREG                    | 3.063 | PDZK1             | 2.507 |
| CSF2           | 8.315  | ANXA6                   | 3.061 | CDH17             | 2.505 |
| APOBEC3G       | 6.756  | ATP8A1                  | 3.059 | RAB26             | 2.501 |
| EGR2           | 6.693  | CARD16                  | 3.023 | JUNB              | 2.497 |
| ARRDC4         | 6.185  | LGALS7 /// LGALS7B      | 3.02  | ABLIM3            | 2.493 |
| PCK1           | 6.039  | PLAC1                   | 3.016 | MLF1              | 2.488 |
| LYZ            | 5.533  | TMEM178                 | 3.011 | C7orf68           | 2.487 |
| IL8            | 5.444  | PTGR1                   | 3.006 | LYZ               | 2.487 |
| EGR3           | 5.148  | NMI                     | 2.995 | BCHE              | 2.483 |
| MLF1           | 5.139  | RGS2                    | 2.99  | SECTM1            | 2.479 |
| ADM            | 5.069  | LRCH3                   | 2.989 | VWDE              | 2.47  |
| IGFBP3         | 4.937  | SCN3A                   | 2.981 | FXYP2             | 2.458 |
| CCL20          | 4.881  | C3                      | 2.961 | PRSS1 /// TRY6    | 2.456 |
| SERPINI1       | 4.776  | SOD2                    | 2.957 | CD58              | 2.456 |
| LPXN           | 4.67   | SYCP2                   | 2.937 | HBA1 /// HBA2     | 2.455 |
| LY96           | 4.663  | ZFP36                   | 2.928 | PROCR             | 2.454 |
| FOS            | 4.627  | GMFG                    | 2.91  | OTUB2             | 2.451 |
| UBE2L6         | 4.503  | TBC1D8B                 | 2.904 | APOBEC3F          | 2.446 |
| PSMB9          | 4.464  | BHLHE41                 | 2.874 | LIF               | 2.428 |
| FXYP2          | 4.403  | GEM                     | 2.859 | ISG20             | 2.411 |
| TBC1D4         | 4.374  | TIGD7                   | 2.853 | ABAT              | 2.408 |
| GBP1           | 4.248  | HLA-DQB1                | 2.852 | NOD2              | 2.408 |
| TRIM31         | 4.247  | SRPX                    | 2.846 | CTSH              | 2.407 |
| SERPINA1       | 4.243  | CD163L1                 | 2.838 | C17orf60          | 2.399 |
| CCDC153        | 4.229  | TIMP3                   | 2.797 | FBXO2             | 2.399 |
| SLC5A3         | 4.213  | EGR1                    | 2.786 | LOC728730         | 2.384 |
| SGK1           | 4.131  | HLA-DQB1                | 2.766 | SLC5A3            | 2.38  |
| HCP5           | 4.107  | CXCL6                   | 2.762 | ZFAND2A           | 2.38  |
| SERPINA1       | 4.088  | GBP2                    | 2.757 | AREGB             | 2.374 |
| KIAA1128       | 4.058  | C10orf116               | 2.752 | GRTP1             | 2.363 |
| LEMD1          | 4.048  | PRRG4                   | 2.751 | HOXA13            | 2.359 |
| EGR4           | 3.962  | SNAI2                   | 2.748 | MTRF1L            | 2.358 |
| SERPINE2       | 3.859  | WFDC3                   | 2.74  | DKK3              | 2.355 |
| TFF2           | 3.833  | TFPI                    | 2.727 | STXBP6            | 2.353 |
| PRAP1          | 3.771  | ECM1                    | 2.714 | C1orf161          | 2.353 |
| FABP1          | 3.62   | CTSS                    | 2.709 | DIRAS2            | 2.35  |
| MAGEB6         | 3.608  | FAM13A                  | 2.704 | CD44              | 2.342 |
| CXCL1          | 3.599  | CARD16 /// CASP1        | 2.7   | LY75              | 2.339 |
| CXCL2          | 3.579  | TUBB2B                  | 2.697 | PTPRM             | 2.339 |
| PPP4R4         | 3.561  | DUSP1                   | 2.691 | DDIT3 /// NR1H3   | 2.337 |
| GBP3           | 3.52   | PER3                    | 2.677 | FGD5              | 2.337 |
| TMEM154        | 3.487  | SYTL4                   | 2.676 | JUN               | 2.334 |
| ADSSL1         | 3.485  | CCND2                   | 2.672 | BDH2              | 2.333 |
| AREG           | 3.472  | DKK3                    | 2.666 | MAGEB2            | 2.329 |
| GABBR1 /// UBD | 3.441  | SLC20A1                 | 2.665 | SAT1              | 2.327 |
| HSPA6          | 3.402  | EA2                     | 2.661 | JUN               | 2.322 |
| LRRRC70        | 3.401  | TRIM34 /// TRIM6-TRIM34 | 2.657 | CD58              | 2.321 |
| ANKRD37        | 3.392  | RASGEF1A                | 2.651 | PSMB8             | 2.321 |
| GDF15          | 3.374  | JUN                     | 2.643 | ISG20             | 2.317 |
| GIMAP2         | 3.372  | CDKN1A                  | 2.635 | ZNF226            | 2.316 |
| FHL1           | 3.369  | TCAM1                   | 2.635 | BHLHE41           | 2.315 |
| DHRS2          | 3.343  | TMEM45B                 | 2.634 | ATP2B4            | 2.313 |
| EGR1           | 3.337  | ITPR1                   | 2.628 | NFKBIZ            | 2.311 |
| KL             | 3.332  | TNNT1                   | 2.603 | CST6              | 2.305 |
| DDIT4          | 3.315  | EGR1                    | 2.597 | NRP2              | 2.304 |
| CREBZF         | 3.31   | NAGS                    | 2.592 | EFNA4             | 2.302 |
| ALPK1          | 3.259  | CYP3A5                  | 2.585 | OAS1              | 2.3   |
| EPAS1          | 3.248  | HECA                    | 2.581 | TMEM45B           | 2.299 |
| EHF            | 3.243  | GCOM1                   | 2.575 | MXD1              | 2.288 |
| DUSP2          | 3.236  | BEAN                    | 2.573 | SLC22A4           | 2.278 |
| CSPG5          | 3.231  | PRSS2                   | 2.565 | AK7               | 2.277 |
| ATP6V0A4       | 3.228  | HCN1                    | 2.555 | ABAT              | 2.268 |
| SRGN           | 3.189  | PRSS1                   | 2.536 | IGF2 /// INS-IGF2 | 2.26  |

| Gene Symbol | Ratio | Gene Symbol     | Ratio | Gene Symbol | Ratio |
|-------------|-------|-----------------|-------|-------------|-------|
| C10orf125   | 2.256 | PKIB            | 2.045 | POF1B       | 0.387 |
| PSD2        | 2.253 | APOC2 /// APOC4 | 2.044 | ITPR2       | 0.383 |
| ZFP14       | 2.234 | PPIC            | 2.041 | CNNM2       | 0.372 |
| CAMK2N1     | 2.233 | BIRC3           | 2.041 | SLC25A31    | 0.37  |
| JAKMIP3     | 2.228 | SPINK7          | 2.039 | HIST1H1E    | 0.33  |
| BCL3        | 2.226 | ZNF818P         | 2.034 | PCDH9       | 0.33  |
| TNFAIP3     | 2.224 | CD58            | 2.033 | ITPR2       | 0.321 |
| FAM113A     | 2.222 | IL8             | 2.032 | FAM43A      | 0.319 |
| TGM2        | 2.22  | EPAG            | 2.029 | AMOTL2      | 0.318 |
| WSB1        | 2.215 | FGFR3           | 2.023 | THBS1       | 0.315 |
| HEMGN       | 2.215 | CXCL3           | 2.022 | SDPR        | 0.302 |
| GDF15       | 2.213 | SLC2A1          | 2.018 | SEMA6A      | 0.29  |
| JUN         | 2.211 | GPR160          | 2.011 | MIRHG1      | 0.273 |
| PRSS3       | 2.206 | ARRB1           | 2.01  | LPCAT1      | 0.26  |
| KLF11       | 2.202 | ERAP1           | 2.008 | SEMA6A      | 0.26  |
| SPAG4       | 2.201 | CHD2            | 2.007 | ABCA13      | 0.155 |
| TFPI        | 2.2   | PTK6            | 2.005 | SDPR        | 0.117 |
| PEX13       | 2.2   | HLA-DQB1        | 2.    |             |       |
| FAM13A      | 2.195 | FOXP1           | 0.499 |             |       |
| BTG2        | 2.184 | SOX2OT          | 0.498 |             |       |
| COL6A1      | 2.181 | HIST1H1B        | 0.496 |             |       |
| PAQR5       | 2.181 | PPL             | 0.495 |             |       |
| ASPHD2      | 2.169 | ASNS            | 0.495 |             |       |
| WWTR1       | 2.164 | SPATA1          | 0.495 |             |       |
| C1orf58     | 2.164 | WNT11           | 0.491 |             |       |
| DOCK8       | 2.162 | JUB             | 0.491 |             |       |
| CDC2L6      | 2.162 | HIST3H2A        | 0.49  |             |       |
| E2F3        | 2.161 | IGF1R           | 0.488 |             |       |
| TFPI        | 2.147 | TMPO            | 0.488 |             |       |
| DAZAP2      | 2.145 | GALNT7          | 0.486 |             |       |
| DUSP5       | 2.136 | SFRS2B          | 0.484 |             |       |
| SMOC2       | 2.133 | MATR3           | 0.482 |             |       |
| RNF183      | 2.127 | HMGB3           | 0.48  |             |       |
| SLC5A3      | 2.126 | PHF17           | 0.48  |             |       |
| VWA5A       | 2.125 | CYFIP2          | 0.479 |             |       |
| TIMP3       | 2.121 | SFRS2B          | 0.479 |             |       |
| GIMAP6      | 2.121 | TMEM133         | 0.47  |             |       |
| CSRNP1      | 2.119 | COL2A1          | 0.463 |             |       |
| TRPC1       | 2.118 | RPS20           | 0.461 |             |       |
| TFPI        | 2.115 | ALDH1A2         | 0.459 |             |       |
| SORBS1      | 2.111 | ILF3            | 0.457 |             |       |
| TAF5        | 2.109 | ELOVL6          | 0.453 |             |       |
| SFRS11      | 2.108 | HIST1H2AC       | 0.452 |             |       |
| CAB39L      | 2.106 | ADAL            | 0.452 |             |       |
| CAMK2N1     | 2.103 | NCRNA00153      | 0.45  |             |       |
| S100A2      | 2.101 | ZNF124          | 0.449 |             |       |
| HGD         | 2.1   | KIAA1659        | 0.449 |             |       |
| TSPAN8      | 2.099 | SOX2            | 0.449 |             |       |
| AP1S2       | 2.098 | GPR177          | 0.448 |             |       |
| FAM114A1    | 2.097 | KCNE3           | 0.446 |             |       |
| BOLA1       | 2.097 | CHM             | 0.443 |             |       |
| DNAJC12     | 2.096 | FRAS1           | 0.439 |             |       |
| DKK3        | 2.093 | DENND1A         | 0.438 |             |       |
| OTUB2       | 2.087 | RPL27A          | 0.437 |             |       |
| CEACAM1     | 2.077 | KRTAP3-3        | 0.437 |             |       |
| AKR1C1      | 2.073 | SYCP3           | 0.433 |             |       |
| RRAS        | 2.072 | ROR1            | 0.43  |             |       |
| WDR5B       | 2.072 | ELOVL6          | 0.426 |             |       |
| NAV2        | 2.071 | MX2             | 0.423 |             |       |
| IFIH1       | 2.066 | RPL13           | 0.422 |             |       |
| RAB26       | 2.065 | MTMR1           | 0.418 |             |       |
| PLAU        | 2.064 | FILIP1          | 0.417 |             |       |
| SLC6A1      | 2.062 | NUP62           | 0.41  |             |       |
| PDK4        | 2.061 | KCNQ5           | 0.409 |             |       |
| CALB2       | 2.055 | IL18            | 0.407 |             |       |
| PMS2L1      | 2.052 | SHANK2          | 0.402 |             |       |
| STXBP6      | 2.049 | RIN2            | 0.39  |             |       |

**Supplementary Table S2** Basic information on the pancreatic cancer patients (n=54)

| Variable                    | Data       |
|-----------------------------|------------|
| Age,y                       |            |
| Mean(SD)                    | 61.3 (8.2) |
| Range                       | 36-77      |
| Sex                         |            |
| Male                        | 30         |
| Female                      | 24         |
| CA199,U/mL                  |            |
| <=37                        | 9          |
| >37                         | 41         |
| Tumor size, cm              |            |
| <=2                         | 6          |
| >2                          | 45         |
| Location                    |            |
| Head of the pancreas        | 39         |
| Body and tail of pancreas   | 15         |
| TNM stage                   |            |
| I                           | 15         |
| II                          | 10         |
| III                         | 27         |
| IV                          | 2          |
| Differentiation grade       |            |
| Poorly deferentiation       | 14         |
| Moderately differentiation  | 37         |
| Well differentiation        | 22         |
| Pathological type           |            |
| Adenocarcinoma              | 49         |
| Adenosquamous carcinoma     | 2          |
| Mucinous cystadenocarcinoma | 3          |

**Supplementary Table S3** Primers for site-directed mutagenesis of *A3G*

| Sites | Primers                                                                                                   |
|-------|-----------------------------------------------------------------------------------------------------------|
| T32A  | top 5'-ATCCTTTCTCGTCGGAATGCCGTCTGGCTGTGCTACGAA-3'<br>bottom 5'-TTCGTAGCACAGCCAGACGGCATTCCGACGAGAAAGGAT-3' |
| T32D  | top 5'-ATCCTTTCTCGTCGGAATGACGTCTGGCTGTGCTACGAA-3'<br>bottom 5'-TTCGTAGCACAGCCAGACGTCATTCCGACGAGAAAGGAT-3' |
| T32E  | top 5'-ATCCTTTCTCGTCGGAATGAAGTCTGGCTGTGCTACGAA-3'<br>bottom 5'-TTCGTAGCACAGCCAGACTTCATTCCGACGAGAAAGGAT-3' |
| T218A | top 5'-GTCAGAGGACGGCATGAGGCTTACCTGTGTTATGAGGTG-3'<br>bottom 5'-CACCTCATAACACAGGTAAGCCTCATGCCGTCCTCTGAC-3' |
| T218D | top 5'-GTCAGAGGACGGCATGAGGATTACCTGTGTTATGAGGTG-3'<br>bottom 5'-CACCTCATAACACAGGTAATCCTCATGCCGTCCTCTGAC-3' |
| T218E | top 5'-GTCAGAGGACGGCATGAGGAATACCTGTGTTATGAGGTG-3'<br>bottom 5'-CACCTCATAACACAGGTATTCCTCATGCCGTCCTCTGAC-3' |

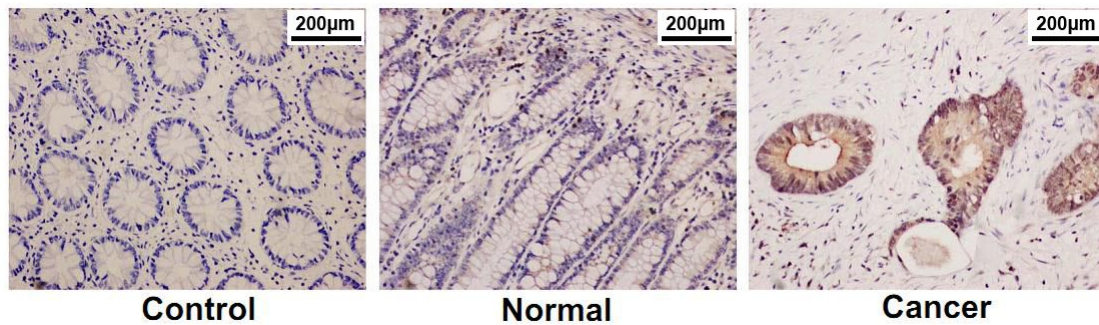

### Supplementary Figure S1 Immunohistochemical staining

Slides from 23 matched human colon cancer and para-cancerous tissues were detected by immunohistochemical staining.

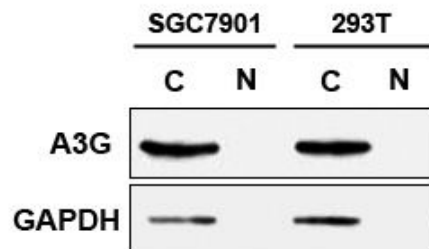

### Supplementary Figure S2 A3G distributed in cytoplasm

A3G was transfected into SGC7901 and 293T cells respectively, nucleus and cytoplasm were separated and subsequently detected by western blot (C: Cytoplasm; N: Nucleus). GAPDH was used as a loading control.

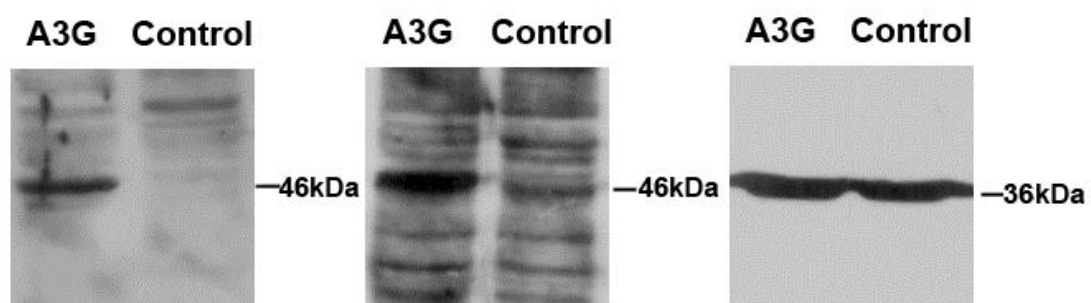

### Supplementary Figure S3 Full length western immunoblots as presented in Figure 2C. The left immunoblot represents HA-tag staining. The middle immunoblot represents A3G staining. The right immunoblot represents GAPDH staining.

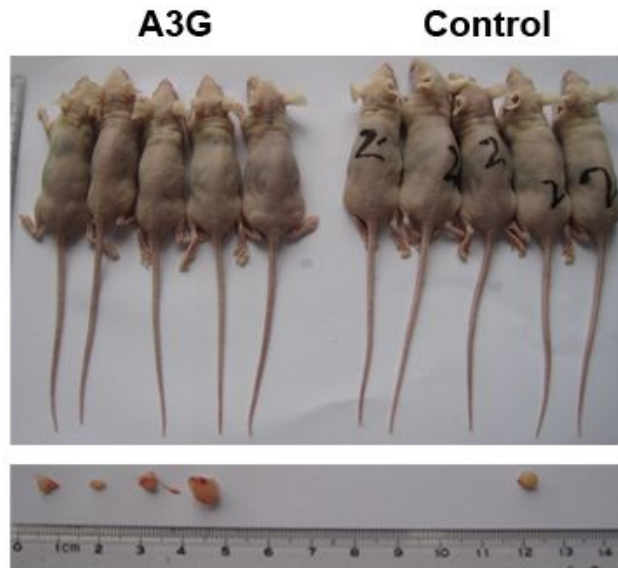

**Supplementary Figure S4** Compared with the control,  $1 \times 10^5$  quantity of the A3G-expressing group could form more xenograft tumor in nude mice after 4 weeks. Two groups' photograph of tumors is shown.

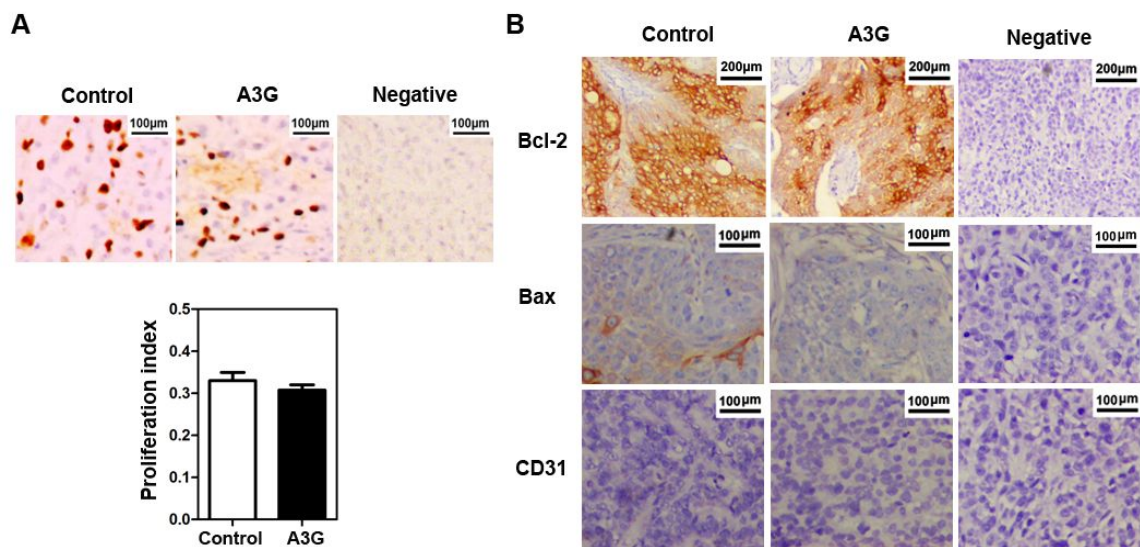

**Supplementary Figure S5** Immunostaining analysis of Ki67, Bcl-2, Bax and CD31 of xenograft tumors respectively generated by A3G-expressing cells and control cells in nude mice for 4 weeks. **A.** Percentage of Ki67-positive cells.  $P > 0.05$ ,  $\chi^2$  test; **B.** Detection of Bcl-2, Bax and CD31 in A3G-expressing group.

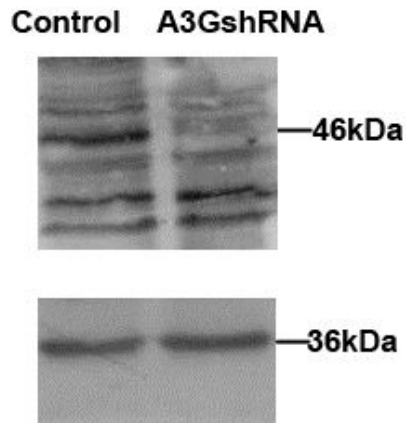

**Supplementary Figure S6** Full length western immunoblots as presented in Figure 3B. The top immunoblot represents A3G staining. The bottom immunoblots represent GAPDH staining.

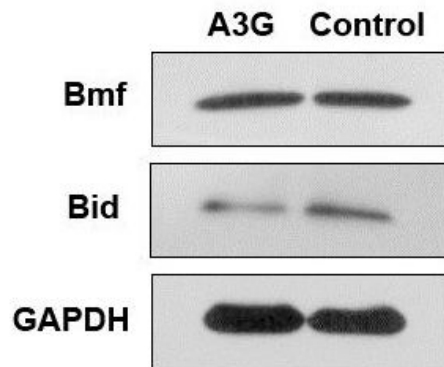

**Supplementary Figure S7 Detection of Bmf and Bid.** Western blot showed that Bid was down-regulated in stable A3G expressing cells, and Bmf was not changed. All data are repeated for three times. GAPDH was used as a loading control.

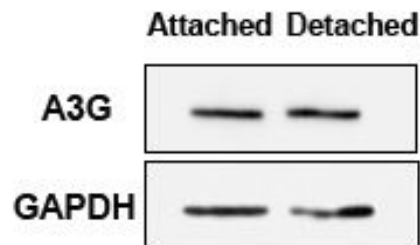

**Supplementary Figure S8** Detection of A3G in attached and detached cells. GAPDH was used as a loading control.

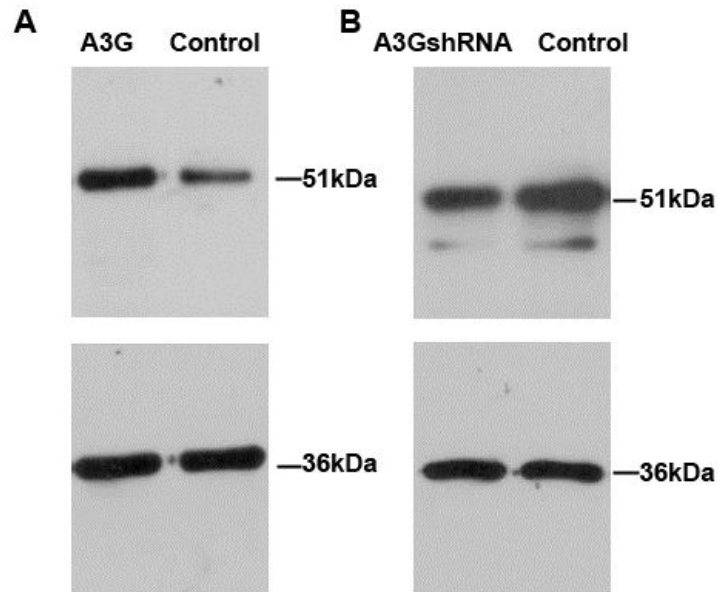

**Supplementary Figure S9** Full length western immunoblots as presented in Figure 4B. The A top represents phospho-GSK3 $\beta$  staining and the A bottom represents GAPDH staining for overexpression of A3G. The B top represents phospho-GSK3 $\beta$  staining and the B bottom represents GAPDH staining for knockdown of A3G.

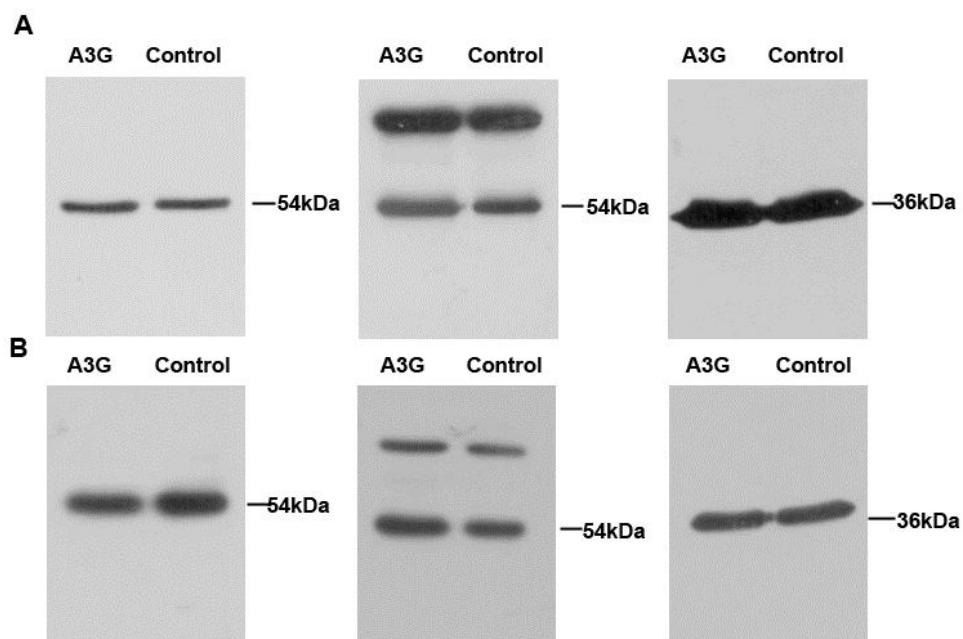

**Supplementary Figure S10** Full length western immunoblots as presented in Figure 4E. The A left represents PTEN staining, A middle represents phosphor-PTEN staining and A right represents GAPDH staining in BxPC3 cells. The B left represents PTEN staining, B middle represents phosphor-PTEN staining and B right represents GAPDH staining in SGC7901 cells.

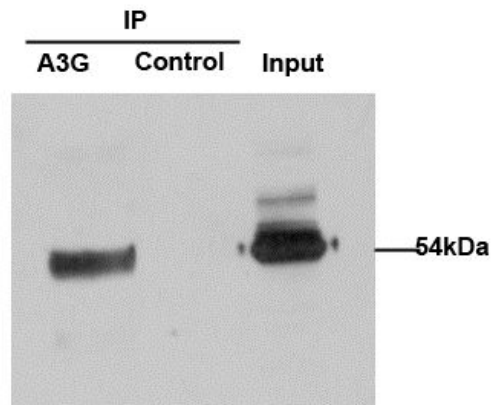

**Supplementary Figure S11** Full length western immunoblots as presented in Figure 4F. The immunoblot represents PTEN staining.

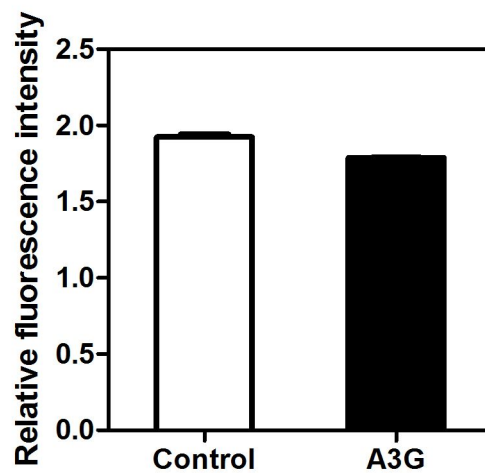

**Supplementary Figure S12 Up-regulation of A3G not affects the NF- $\kappa$ B activity.** A3G was co-transfected into 293T cells with the NF- $\kappa$ B/pGL2 luciferase reporter plasmid, and luciferase activity was assayed 24 h later (\* $P$ <0.05, \*\* $P$ <0.01; Student's  $t$ -test). All data are represented as the means  $\pm$  SEM of triplicate experiments.
